# Supplementary material for: Chromatin architecture reorganization during neuronal cell differentiation in Drosophila genome
Source: PubMed Central journal article supplement (PMC6442379; doi:10.1101/gr.246710.118), 2019-04
Supplement: supp_gr.246710.118_Supplemental_Fig_S4.pdf [file supp_gr.246710.118_Supplemental_Fig_S4.pdf]

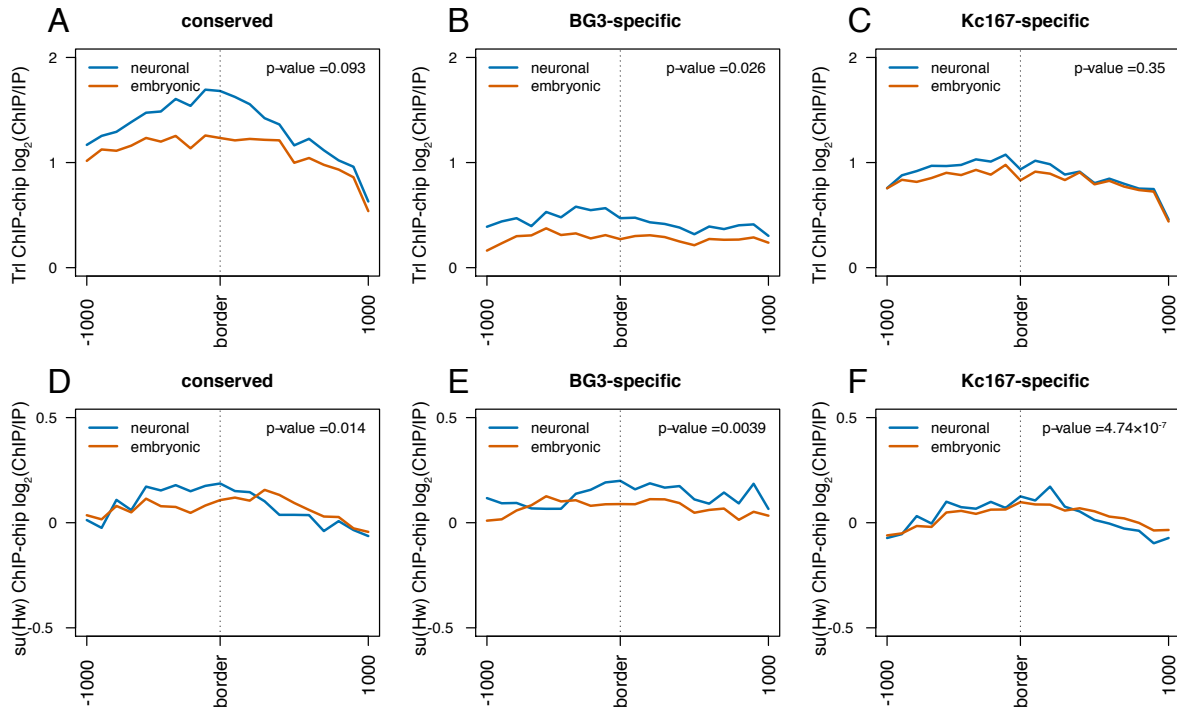

**Figure S4. Only some architectural proteins differentially occupy TAD borders in a cell-specific manner.**

(A-C) Average Trl ChIP-chip signal ( $\log_2$  ChIP/input) at borders of three different TAD classes (conserved, BG3-specific and Kc167-specific). Red line represents data from embryonic cells and blue from neuronal derived cells. Average profile is plotted as mentioned in Fig 4. We performed a non-parametric Mann-Whitney  $U$  test considering the highest levels at each TAD border between embryonic and neuronal cells (see reported p-value). (D-F) Average su(Hw) ChIP-chip signal ( $\log_2$  ChIP/input) at borders of the three different TAD classes.
