# Supplementary material for: Chromatin architecture reorganization during neuronal cell differentiation in Drosophila genome
Source: PubMed Central journal article supplement (PMC6442379; doi:10.1101/gr.246710.118), 2019-04
Supplement: supp_gr.246710.118_Supplemental_Fig_S5.pdf [file supp_gr.246710.118_Supplemental_Fig_S5.pdf]

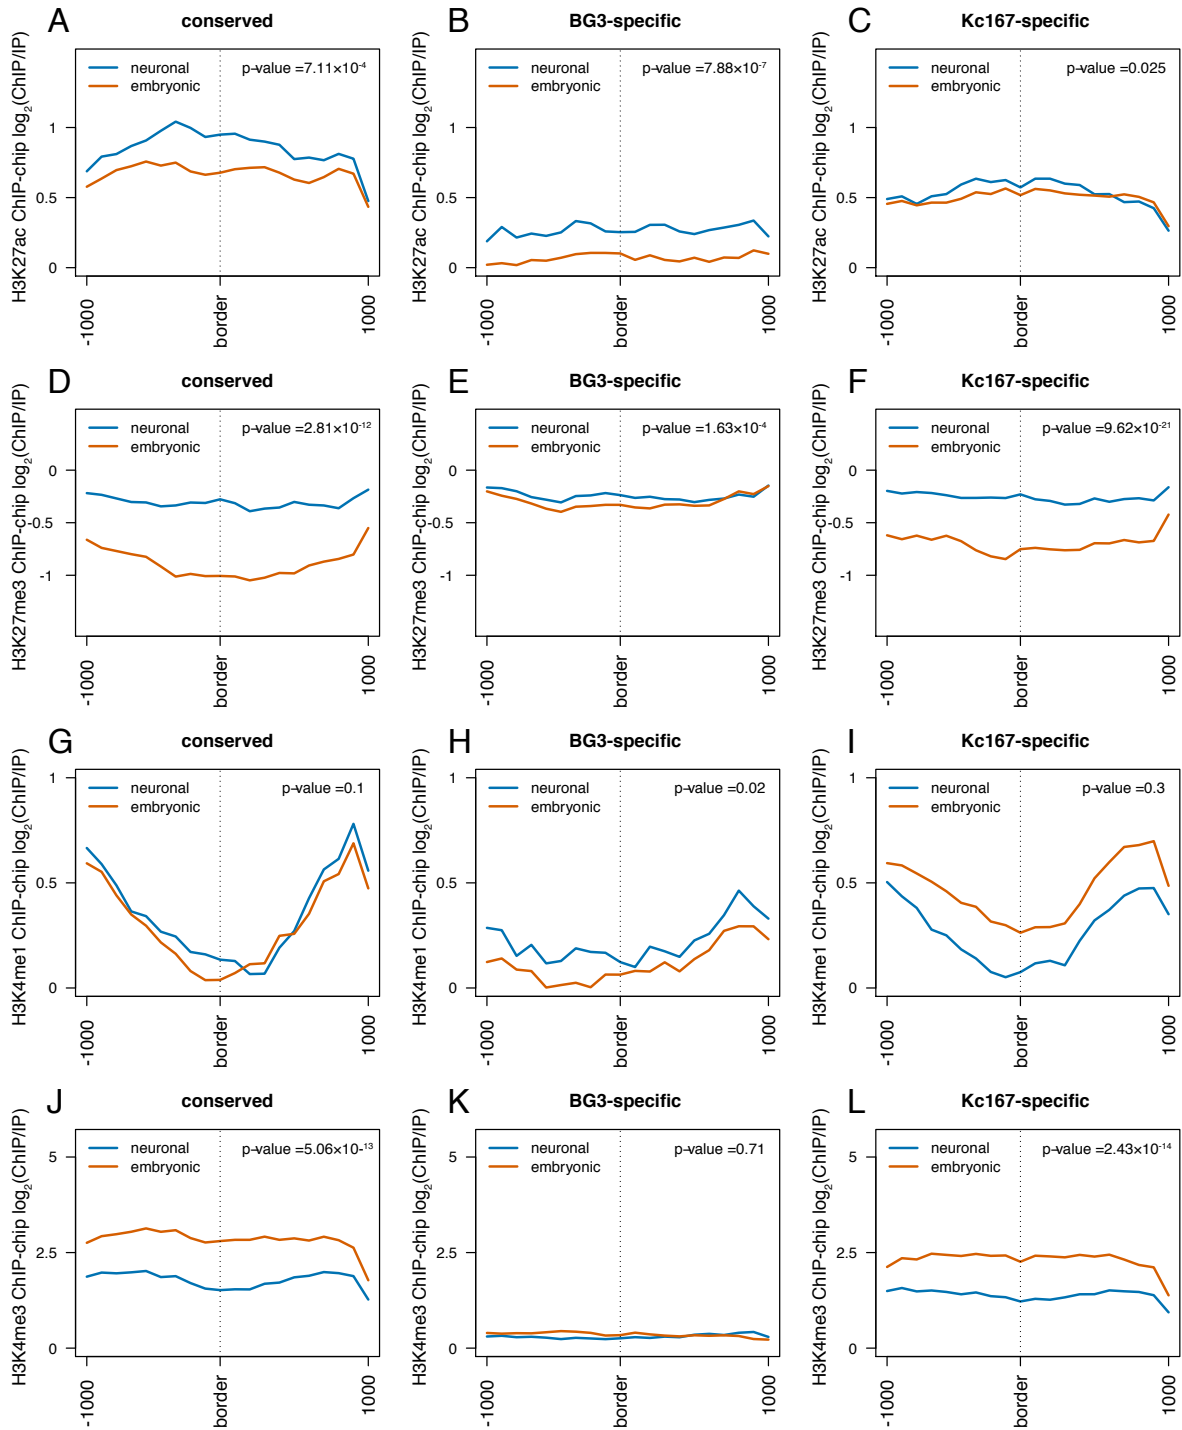

**Figure S5. Histone marks are present at TAD borders in a cell-specific manner.** Average levels of histone marks, ChIP-chip signal ( $\log_2$  ChIP/input), at borders of three different TAD classes (conserved, BG3-specific and Kc167-specific). Red line represents data from embryonic cells and blue from neuronal derived cells. Average profile is plotted considering 1 kb around each border. We performed a non-parametric Mann-Whitney  $U$  test considering the highest levels at each TAD border between embryonic and neuronal cells (see reported p-value). We plotted the following histone marks: (A-C) H3K27ac (D-F) H3K27me3 (G-I) H3K4me1 and (J-L) H3K4me3.
