# Supplementary material for: Chromatin architecture reorganization during neuronal cell differentiation in Drosophila genome
Source: PubMed Central journal article supplement (PMC6442379; doi:10.1101/gr.246710.118), 2019-04
Supplement: supp_gr.246710.118_Supplemental_Fig_S6.pdf [file supp_gr.246710.118_Supplemental_Fig_S6.pdf]

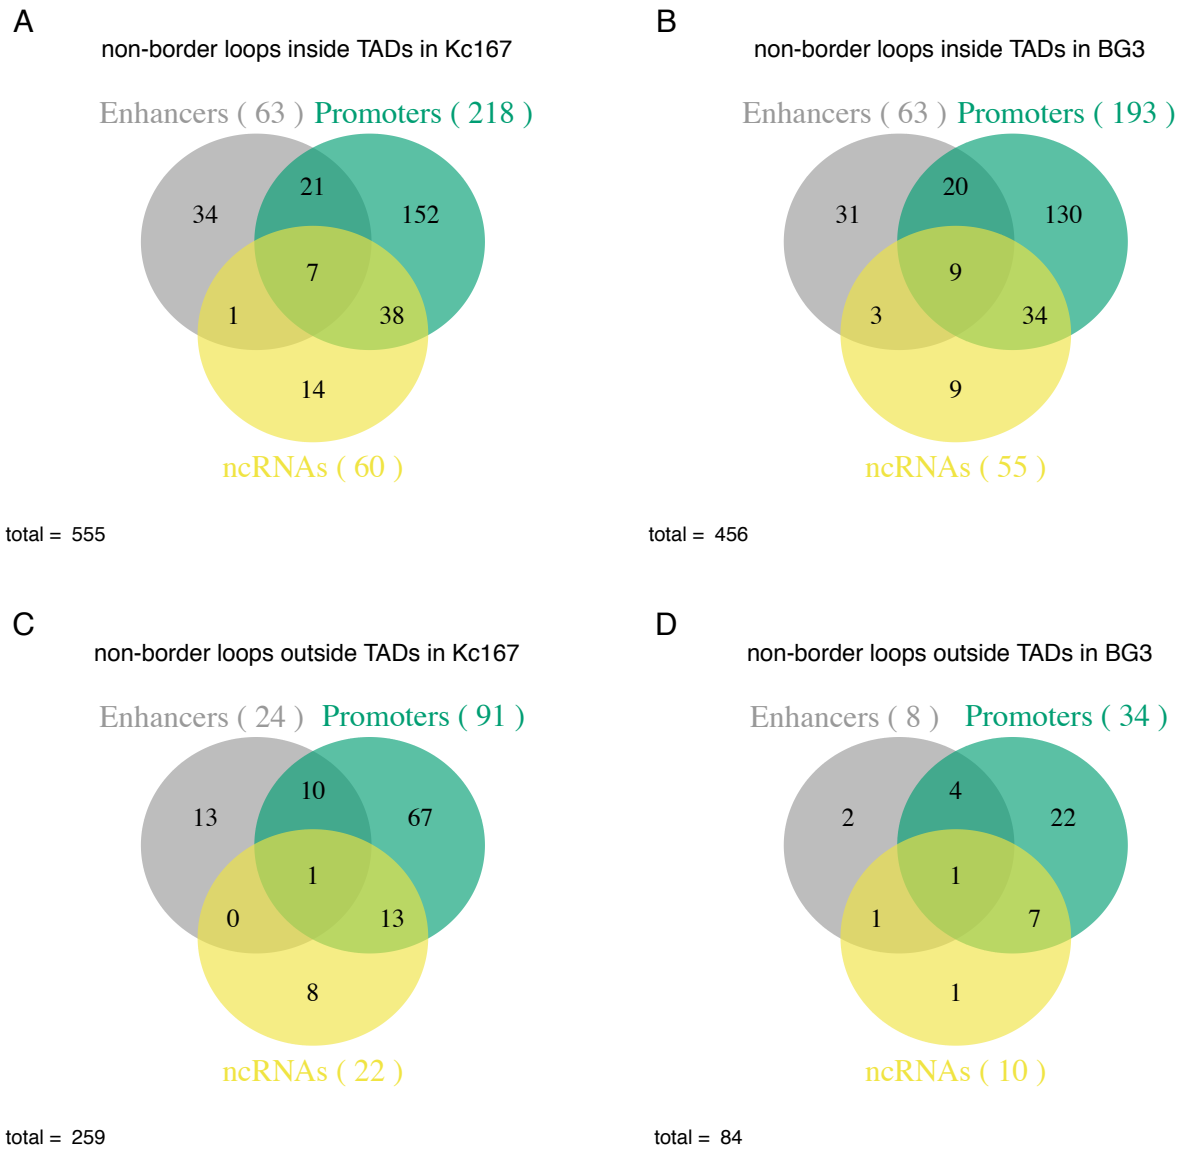

**Figure S6. Annotations of the anchors of chromatin loops.**

Venn diagrams representing the number of chromatin loops that have at one of the anchors promoters (green), ncRNAs (yellow) or enhancers (grey). (A-B) Chromatin loops where both anchors are inside the same TAD in (A) Kc167 cells and (B) BG3 cells. (C-D) Chromatin loops where the anchors are in different TADs in (C) Kc167 cells and (D) BG3 cells.
